# Supplementary material for: Translating Virtual Reality Cue Exposure Therapy for Binge Eating into a Real-World Setting: A Pilot Study
Source: Preprints.org preprint supplement (doi:10.20944/preprints202103.0152.v1), 2021-03-04
Supplement: Supplementary file 4 [file JCM_Supplementary_Table2.docx]

*Table S2: Binge and Purge Behavior Outcomes*

| *Per week* | *OBE’s*  *(N=9)* | | | *SBE’s*  *(N=9)* | | | *Purging*  *(N=2)* | | |
| --- | --- | --- | --- | --- | --- | --- | --- | --- | --- |
| **Timepoint** | **Pre** | **Post** | **Follow-Up** | **Pre** | **Post** | **Follow-Up** | **Pre** | **Post** | **Follow-Up** |
| *Mean* | 3.80 | 0.60 | 1.22 | 3.00 | 1.22 | 2.40 | 1.00 | 0.25 | 0 |
| *SD* | 1.20 | 1.00 | 1.80 | 2.54 | 1.14 | 2.56 | 1.41 | 0.35 | 0 |

| *Per week* | *OBE’s*  *(N=11)* | | | *SBE’s*  *(N=11)* | | | *Purging*  *(N=2)* | | |
| --- | --- | --- | --- | --- | --- | --- | --- | --- | --- |
| **Timepoint** | **Pre** | **Post** | **Follow-Up** | **Pre** | **Post** | **Follow-Up** | **Pre** | **Post** | **Follow-Up** |
| *Mean* | 3.27 | 0.94 | 1.20 | 3.09 | 1.27 | 2.43 | 1.00 | 0.25 | 0 |
| *SD* | 1.56 | 1.34 | 1.66 | 2.30 | 1.06 | 2.40 | 1.41 | 0.35 | 0 |
