# Supplementary figures and images for: Translating Virtual Reality Cue Exposure Therapy for Binge Eating into a Real-World Setting: A Pilot Study
Source: Preprints.org preprint supplement (doi:10.20944/preprints202103.0152.v1), 2021-03-04

*Photo S1: Environments and Example Foods*


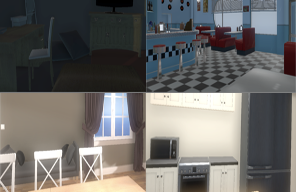


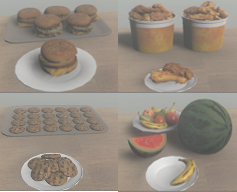

Supplement: Supplementary file 1 [file supplementary]
